# Supplementary material for: Chiral ionic organic single-crystal and its exfoliated two-dimensional nanosheets with enhanced enantioseparation
Source: Royal Society of Chemistry journal article supplement (doi:10.1039/d4sc04990j), 2024-01-01
Supplement: d4sc04990j1.pdf [file d4sc04990j1.pdf]

## Supporting Information for

# Chiral Ionic Organic Single-Crystal and Its Exfoliated Two-Dimensional Nanosheets with Boosting Enantioseparation

Huifeng Liu<sup>a,b</sup>, Yongrui He<sup>c</sup>, Jia Chen<sup>a,\*</sup>, Xiaoqing Qu<sup>a,b</sup>, Jing He<sup>a</sup>, Xuwei Chen<sup>b,\*</sup>, Jianhua Wang<sup>b</sup>, Hongdeng Qiu<sup>a,d,\*</sup>

<sup>a</sup> Key Laboratory for Natural Medicine of Gansu Province, Lanzhou Institute of Chemical Physics, Chinese Academy of Sciences, Lanzhou 730000, China

<sup>b</sup> Department of Chemistry, College of Sciences, Northeastern University, Shenyang 110819, China

<sup>c</sup> School of Pharmacy, Shandong Second Medical University, Weifang 261053, China

<sup>d</sup> Key Laboratory of Rare Earths, Ganjiang Innovation Academy, Chinese Academy of Sciences, Ganzhou 341000, China

---

\*Corresponding e-mail:

jiachen@licp.cas.cn (J. Chen);

chenxuwei@mail.neu.edu.cn (X. Chen);

hdqiu@licp.cas.cn (H. Qiu)

## Table of Contents

|                                                     |     |
|-----------------------------------------------------|-----|
| 1. Reagents and Apparatus .....                     | S3  |
| 2. Materials Preparation .....                      | S3  |
| 3. Calculations of chromatographic parameters ..... | S4  |
| 4. Fig. S1 to S10.....                              | S5  |
| 5. Table S1 to S11.....                             | S15 |

## 1. Reagents and Apparatus

Tetraethyl orthosilicate (TEOS), polymethylhydrosiloxane (PMHS) and trifluoroacetic acid (TFA, 95%) were purchased from J&K. Sci-entific. Ltd. (Beijing, China); Polydimethylsiloxane (HO-TOS) was got from Alfa Aesar (Heysham, UK). The rest of the reagents used were analytically pure and purchased from Shanghai McLean Biochemical Technology Co. Untreated fused-silica capillary tubing (0.25 mm i.d.) was obtained from Yongnian Ruifeng Chromatogram Apparatus Co. Ltd. (Hebei, China). Commercial Abel AB-5MS capillary column (long 30 m × i.d. 0.25 mm × film thickness 0.25 μm) was obtained from Abel Ltd (America). Commercial β-DEX 120 column (long 30 m × i.d. 0.25 mm × film thickness 0.25 μm) was obtained Supelco Inc. (Bellefonte, PA, USA). The field emission scanning electron microscope (JSM-6701F, Japan) was used to characterize the morphology of materials and capillary columns; the transmission electron microscopy (Tecnai G2 TF20, FEIUSA) was used to receive the high resolution transmission electron microscope and selected area diffraction image of the 2D-NSs, the scanning probe microscope (Bruker Nano Inc, America) was used to test the thickness of 2D-NSs, the thermal gravimetric analyzer (STA449C, Germany) is used to test the thermal stability of materials; the Bruker DRX-500 NMR spectrometer (Bremen, Germany) is used for measure compound structure, Fourier transform infrared spectrometer (V70, Bruker, Germany) was used to examine the composition of materials. All the gas chromatograms were obtained by an Echrom gas chromatograph (A-90E, China) equipped with a split/splitless injector and a flame ionization detector (FID), with high-purity nitrogen (99.999%) used as the carrier gas, the injection port maintained at 250°C, the injection volume set at 1 μL, and the FID detector temperature set at 280°C.

## 2. Materials Preparation

### Synthesis of CIL

Synthesis of CIL based on reported literature.<sup>[1-2]</sup> Firstly, L-menthol (15.63 g, 0.10 mol) was dissolved in a 250 mL round-bottom flask with 50 mL of CH<sub>2</sub>Cl<sub>2</sub>, and the resulting mixture was heated to 33°C to form a homogeneous transparent solution. Bromoacetyl bromide (22.43 g, 0.11 mol) was added to the above solution, and the reaction was carried out at 43°C for 3 h. The resulting product was washed three times with 40 mL of saturated Na<sub>2</sub>SO<sub>4</sub> solution, and the organic phase was dried overnight with anhydrous Na<sub>2</sub>SO<sub>4</sub>. Finally, the filtrate was subjected to vacuum distillation, yielding a transparent orange liquid, which is identified as (1R,2S,5R)-2-isopropyl-5-methylcyclohexyl 2-bromoacetate. Then, (1R,2S,5R)-2-isopropyl-5-methylcyclohexyl 2-bromoacetat (1.86 g, 0.0254 mmol) and 4,4'-bipyridine (0.50 g, 0.0032 mmol) were dissolved in 50 mL acetonitrile then heated to 82°C for 8 h. CIL is the yellow powder solid obtained by filtration of the obtained substance, rotary evaporation to remove the solution and drying.

### Synthesis of pyroglutamic acid derivative

According to literature reports, the synthesis of derivative of pyroglutamic acid was carried out as follows<sup>[3]</sup>: A solution was prepared by dissolving pyroglutamic acid (100 mg) and 1 mL of isopropanol-acetyl chloride (3:1, v/v) in a polytetrafluoroethylene-lined vessel, which was then sealed and reacted at 110°C for 1 h. The excess solvent was removed, and the resulting product was

dissolved in THF (5 mL). Trifluoroacetic anhydride (1 mL) was slowly added dropwise to the solution, which was then sealed and heated at 90°C for 1 h to yield the trifluoroacetyl butyl ester derivative of pyroglutamic acid.

### Fabrication of CIL, CIOC and 2D-NSs coated capillary columns

CIL, CIOC and 2D-NSs coated capillary columns (10 m × 0.25 mm i.d.) were prepared using the sol-gel method:<sup>[4-5]</sup> 100 μL of TEOS, 200 μL of HO-TOS, and 10 μL of PMHS were mixed thoroughly in a 10 mL centrifuge tube, then 2.72 mg of CIL/CIOC/2D-NSs with 500 μL of CH<sub>2</sub>Cl<sub>2</sub> were added into the mixture and sonicated for 5 min. Finally, another 500 μL of CH<sub>2</sub>Cl<sub>2</sub> and 150 μL TFA were added and sonicated for 5 min to obtain the gel solution. The prepared solution was then carefully pumped into a pre-treated capillary column, where it was allowed to be kept at room temperature for a period of 30 min, followed by expelling the solution from the capillary column. Subsequently, the coated capillary column was subjected to an aging process consisting of holding it at a temperature of 40°C for 30 min, gradually increasing the temperature to 200°C at a rate of 1 °C min<sup>-1</sup>, and maintaining it at 200°C for 6 h, which ultimately led to the successful preparation of the CIL, CIOC or 2D-NSs coated capillary column, respectively.

### 3. Calculations of chromatographic parameters

The efficiency of separation was calculated by the following equations:<sup>[6]</sup>

Separation factor ( $\alpha$ ):

$$\alpha = \frac{t_{R2} - t_M}{t_{R1} - t_M} \quad (1)$$

Resolution ( $R_s$ ):

$$R_s = \frac{2(t_{R2} - t_{R1})}{w_1 + w_2} \quad (2)$$

t: retention time;  $t_M$ : bed void time;  $W$ : the peak widths.

The enthalpy change ( $\Delta H$ ) and entropy change ( $\Delta S$ ) are calculated by the following formula:<sup>[7]</sup>

$$\ln K = -\frac{\Delta H}{RT} + \frac{\Delta S}{R} + \ln \phi \quad (3)$$

T: the column temperature;  $\phi$ : the phase ratio.

#### 4. Fig. S1 to S10

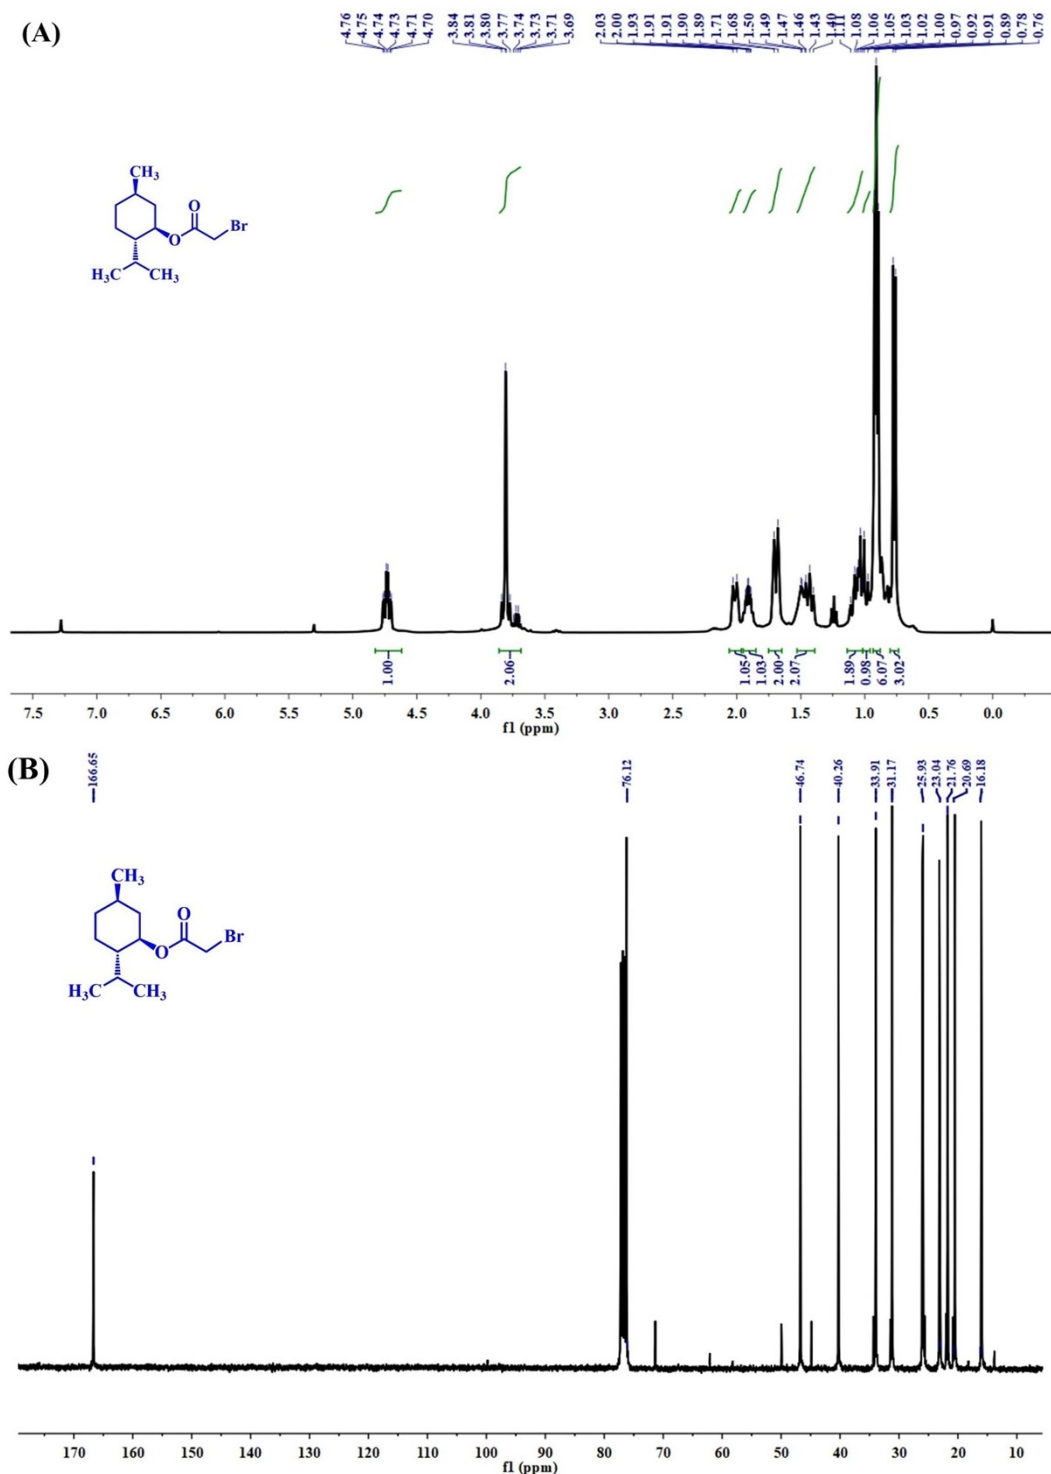

**Fig. S1.** NMR of (1R,2S,5R)-2-isopropyl-5-methylcyclohexyl 2-bromoacetate. (A)  $^1\text{H}$  NMR ( $\text{CDCl}_3$ , 400 MHz,  $\delta/\text{ppm}$ )  $\delta$ : 0.76-0.78 (d, 3H), 0.89-0.92 (t, 6H), 0.97-1.00 (d, 1H), 1.02-1.11 (m, 2H), 1.40-1.50 (m, 2H), 1.68-1.71 (d, 2H), 1.88-1.94 (m, 1H), 2.00-2.03 (d, 1H), 3.69-3.84 (m, 2H), 4.70-4.76 (m, 1H); (B)  $^{13}\text{C}$  NMR ( $\text{DMSO}$ , 400 MHz,  $\delta/\text{ppm}$ )  $\delta$ : 16.18, 20.69, 21.76, 23.04, 25.93, 31.17, 33.91, 40.26, 46.74, 76.12, 166.65.

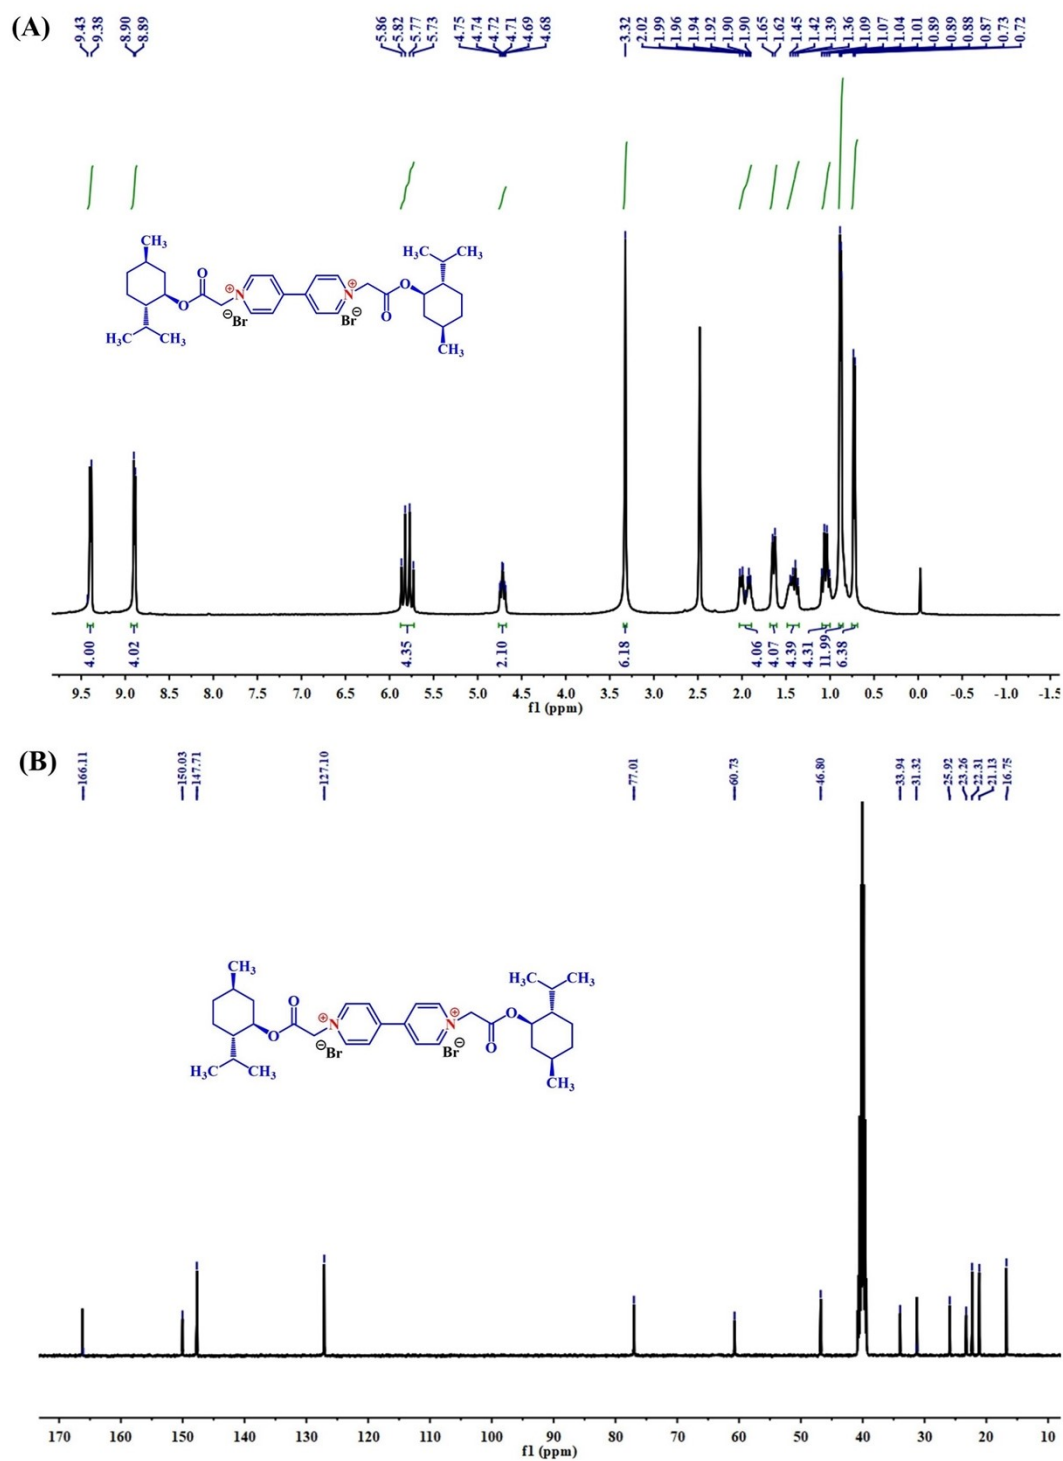

**Fig. S2.** NMR of CIL. (A)  $^1\text{H}$  NMR ( $\text{CDCl}_3$ , 400 MHz,  $\delta/\text{ppm}$ )  $\delta$ : 0.72-0.73 (d, 6H), 0.87-0.89 (m, 12H), 1.01-1.09 (m, 4H), 1.36-1.45 (m, 4H), 1.40-1.50 (m, 2H), 1.62-1.65 (d, 4H), 1.90-2.20 (m, 4H), 3.32 (s, 6H), 4.68-4.75 (m, 2H), 5.73-5.86 (m, 4H), 8.89-8.90 (d, 4H), 9.38-9.443 (d, 4H); (B)  $^{13}\text{C}$  NMR (DMSO, 400 MHz,  $\delta/\text{ppm}$ )  $\delta$ : 16.75, 21.13, 22.31, 23.26, 25.92, 31.32, 33.94, 46.80, 60.73, 77.01, 127.10, 147.71, 150.03, 166.11.

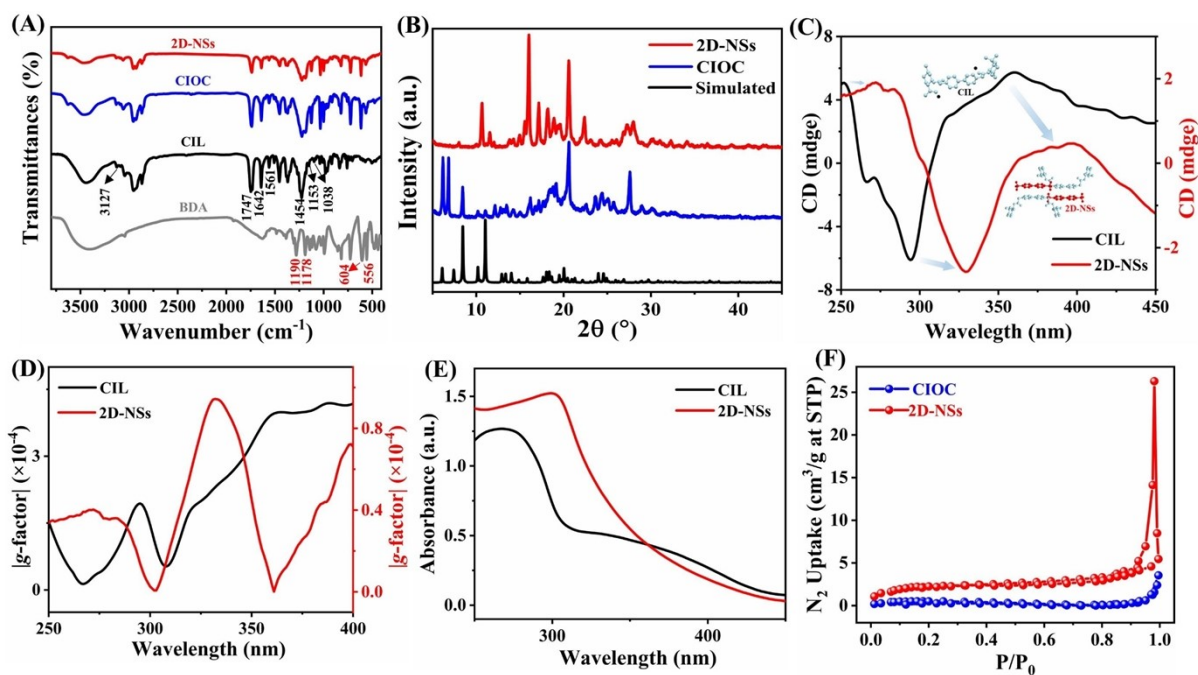

**Fig. S3.** FT-IR spectra of BDA, CIL, CIOC and 2D-NSs(A). XRD patterns of CIOC and 2D-NSs, simulated structure of CIOC (B). Solid CD (C), relevant  $g$ -factor (D) and UV-vis absorption spectra of CIL and 2D-NSs (E).  $N_2$  sorption isotherms of CIOC and 2D-NSs (F).

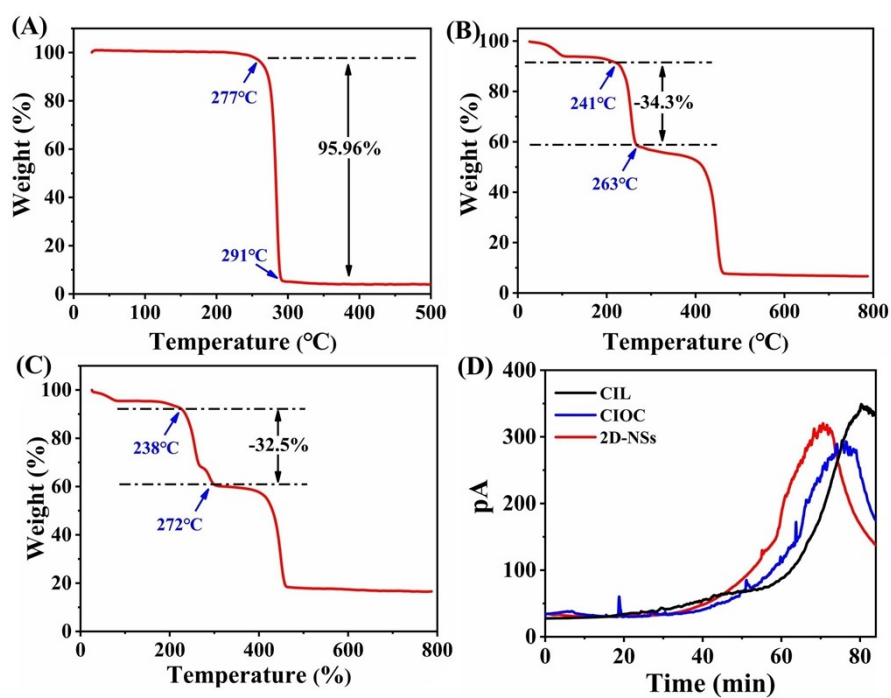

**Fig. S4.** Thermogravimetric curve of CIL (A), CIOC (B) and 2D-NSs (C). Bleeding curves of CIL-/CIOC-/2D-NSs coated columns (D). Oven program: 40°C to 250°C at 3 °C min<sup>-1</sup>. Flow rate: 1.0 mL min<sup>-1</sup>.



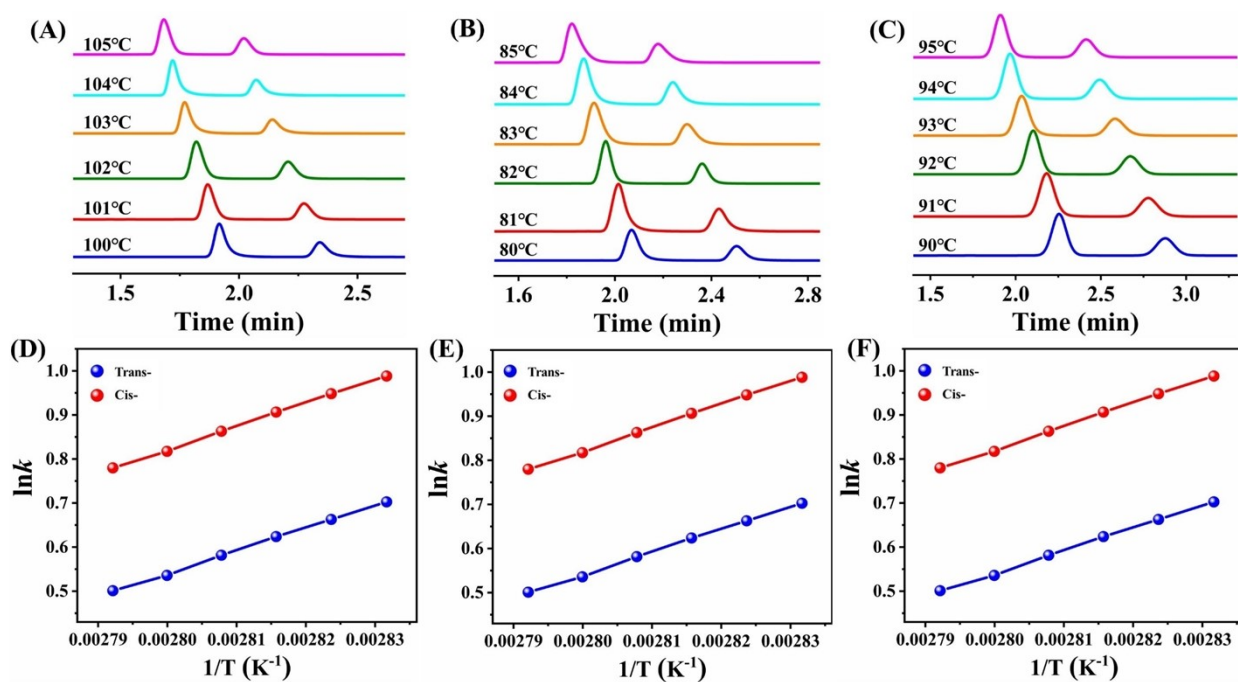

Fi

**g. S5.** Chromatograms of decahydronaphthalene isomers at varying temperature (100-105°C) on CIL coated columns (A), Van't Hoff plot of trans-/cis-decahydronaphthalene (D). Chromatograms of decahydronaphthalene isomer at varying temperature (80-85°C) on ClOC coated columns (B), Van't Hoff plot of trans-/cis-decahydronaphthalene (E). Chromatograms of decahydronaphthalene isomers at varying temperature (90-95°C) on 2D-NSs coated columns (C), Van't Hoff plot of trans-/cis-decahydronaphthalene (F).

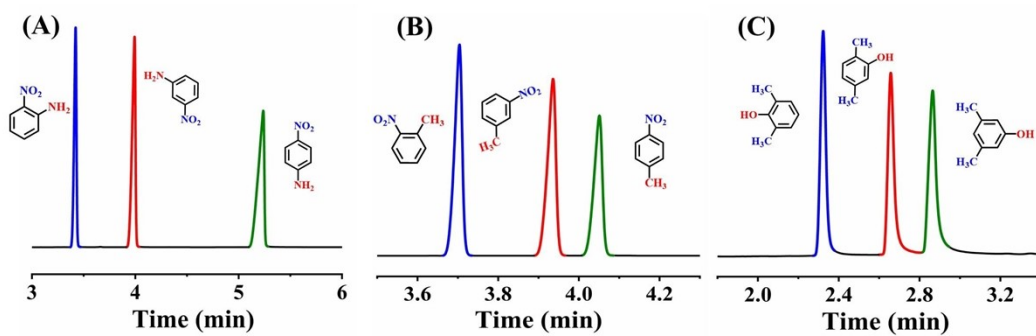

**Fig. S6.** Gas chromatograms of positional isomers on AB-5MS column (long 30 m): nitroaniline (A), nitrotoluene (B), dimethylphenol (C). Oven program: 100°C to 170°C at 30 °C min<sup>-1</sup> for (A), 50°C to 150°C at 30 °C min<sup>-1</sup> for (B), 70°C to 150°C at 20 °C min<sup>-1</sup> for (C). Flow rate: 3.0 mL min<sup>-1</sup> for (A); 2.0 mL min<sup>-1</sup> for (B, C).

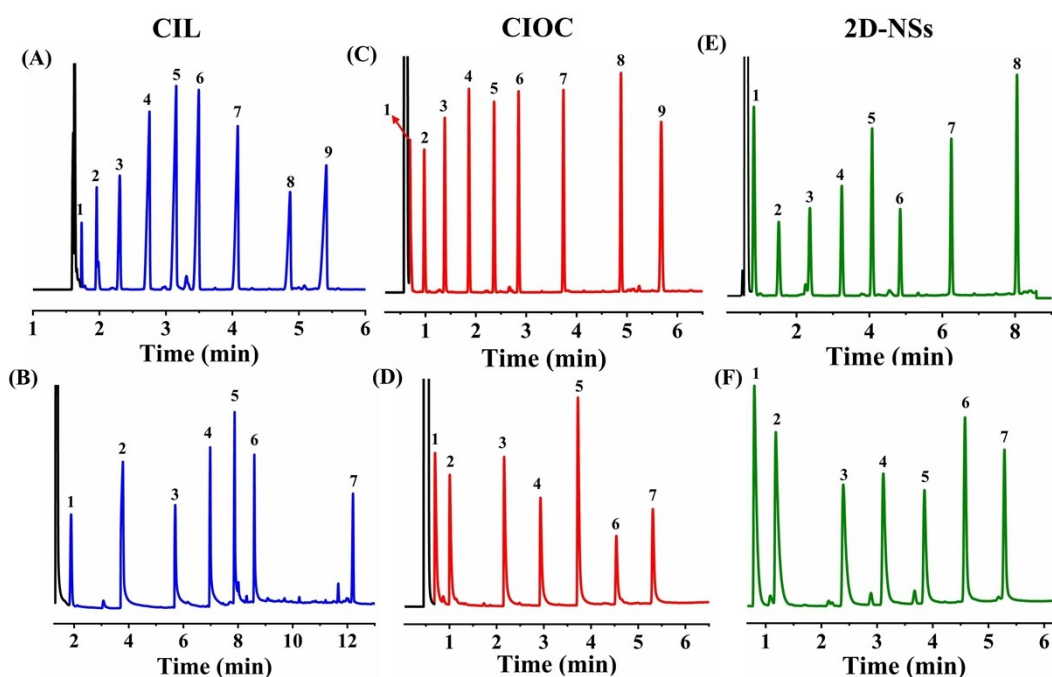

**Fig. S7.** Separation of n-alkanes and n-alkanols on CIL, CIOC and 2D-NSs columns. Gas chromatograms on CIL coated column of n-alkanes (A): (1) n-hexane, (2) n-heptane, (3) n-octane, (4) n-nonane, (5) n-decane, (6) n-undecane, (7) n-tridecane, (8) n-hexadecane, (9) n-octadecane; n-alkanols (B): (1) n-butanol, (2) n-hexanol, (3) n-heptanol, (4) n-octanol, (5) n-nonanol, (6) n-decanol, (7) n-undecanol. Gas chromatograms on CIOC coated column n-alkanes (C): (1) n-hexane, (2) n-heptane, (3) n-octane, (4) n-nonane, (5) n-decane, (6) n-undecane, (7) n-tridecane, (8) n-hexadecane, (9) n-octadecane; n-alkanols (D): (1) n-propanol, (2) n-butanol, (3) n-hexanol, (4) n-heptanol, (5) n-octanol, (6) n-nonanol, (7) n-decanol. Gas chromatograms on 2D-NSs coated column of n-alkanes (E): (1) n-hexane, (2) n-heptane, (3) n-octane, (4) n-nonane, (5) n-decane, (6) n-undecane, (7) n-tridecane, (8) n-hexadecane; n-alkanols (F): (1) n-butanol, (2) n-hexanol, (3) n-heptanol, (4) n-octanol, (5) n-nonanol, (6) n-decanol, (7) n-undecanol. Oven program: 30°C (for 1 min) to 60°C at 20 °C min<sup>-1</sup>, to 180°C at 40 °C min<sup>-1</sup> for (A); 35°C (for 2 min) to 100°C at 20 °C min<sup>-1</sup> for (B); 32°C to 180°C at 30 °C min<sup>-1</sup> for (C); 50°C to 130°C at 15 °C min<sup>-1</sup> for (D); 40°C (for 1 min) to 180°C at 20 °C min<sup>-1</sup> for (E); 50°C to 180°C at 20 °C min<sup>-1</sup> for (F). Flow rate: 3.0 mL min<sup>-1</sup> for (A); 0.5 mL min<sup>-1</sup> (for 2 min) to 3.0 mL min<sup>-1</sup> at 2 min min<sup>-2</sup> for (B); 2.0 mL min<sup>-1</sup> for (C, D, E); 1.5 mL min<sup>-1</sup> for (F).

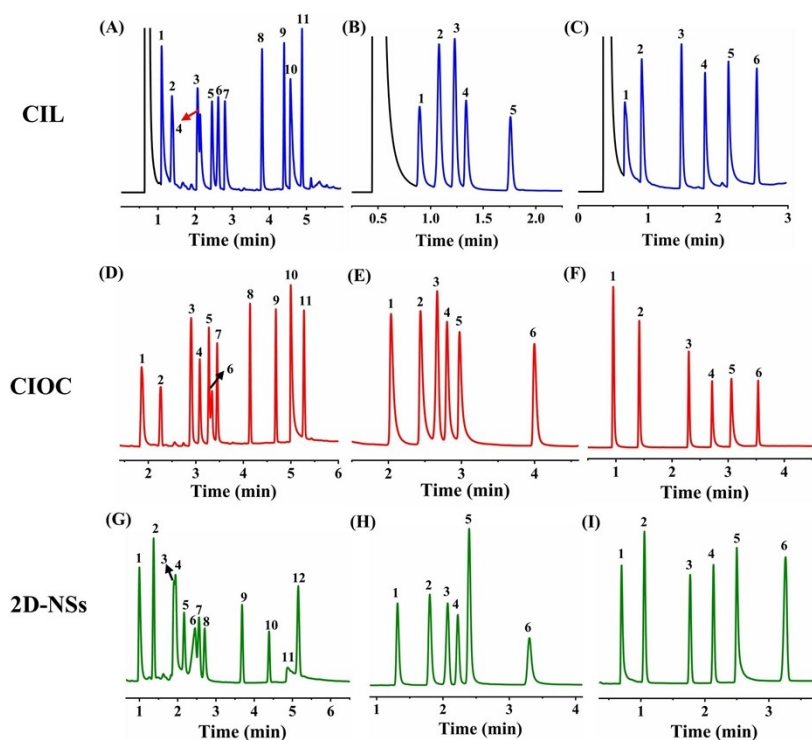

**Fig. S8.** Separation of Grob, phenols and anilines mixtures on CIL, CIOC and 2D-NSs coated columns. Gas chromatographs on CIL coated column of Grob mixture (A): (1) 2,3-butanediol, (2) decane, (3) n-octanol + nonanal, (4) 2,6-dimethylphenol (5) dodecane, (6) 2,6-dimethylaniline, (7) 2-ethylhexanoic acid, (8) dicyclohexyl amine, (9) methyl undecanoate, (10) dicyclohexyl amine, (11) methyl dodecanoate; phenols mixtures (B): (1) phenol, (2) 4-methylphenol, (3) 2,5-dimethylphenol, (4) p-dimethylphenol, (5) 4-tert-butylphenol; anilines mixtures (C): (1) aniline, (2) 2-chloroaniline, (3) 2,4-dichloroaniline, (4) 2-nitroaniline, (5) 3-nitroaniline, (6) tribromoaniline. Gas chromatographs on CIOC coated column of Grob mixture (D): (1) 2,3-butanediol, (2) decane, (3) n-octanol + nonanal, (4) 2,6-dimethylphenol, (5) dodecane, (6) 2,6-dimethylaniline, (7) 2-ethylhexanoic acid, (8) methyl decanoate, (9) methyl undecanoate, (10) dicyclohexyl amine, (11) methyl dodecanoate; phenols mixtures (E): (1) phenol, (2) 4-methylphenol, (3) 2-nitrophenol, (4) 2,5-dimethylphenol, (5) 3-ethylphenol (6) 4-tert-butylphenol; anilines mixtures (F): (1) aniline, (2) 2-chloroaniline, (3) 2,4-dichloroaniline, (4) 2-nitroaniline, (5) 3-nitroaniline, (6) tribromoaniline. Gas chromatographs on 2D-NSs column of Grob mixture (G): (1) 2,3-butanediol, (2) decane, (3) n-octanol, (4) nonanal, (5) 2,6-dimethylphenol, (6) dodecane, (7) 2,6-dimethylaniline, (8) 2-ethylhexanoic acid, (9) methyl decanoate, (10) methyl undecanoate, (11) dicyclohexyl amine, (12) methyl dodecanoate; phenols mixtures (H): (1) phenol, (2) 4-methylphenol, (3) 2-nitrophenol, (4) 2,5-dimethylphenol, (5) 3-ethylphenol (6) 4-tert-butylphenol; anilines mixtures (I): (1) aniline, (2) 2-chloroaniline, (3) 2,4-dichloroaniline, (4) 2-nitroaniline, (5) 3-nitroaniline, (6) 1,3,5-tribromoaniline. Oven program: 80°C to 110°C at 10 °C min<sup>-1</sup>, to 180°C at 30 °C min<sup>-1</sup> for (A); 90°C to 190°C at 25 °C min<sup>-1</sup> for (B); 100°C to 190°C at 30 °C min<sup>-1</sup> for (C); 90°C to 180°C at 25 °C min<sup>-1</sup> for (D); 110°C to 150°C at 20 °C min<sup>-1</sup> for (E); 100°C to 150°C at 20 °C min<sup>-1</sup>, to 190°C at 40 °C min<sup>-1</sup> for (F); 100°C to 130°C ( for 1 min) at 20 °C min<sup>-1</sup>, to 170°C at 20 °C min<sup>-1</sup> for (G); 110°C to 130°C at 10 °C min<sup>-1</sup>, to 150°C at 25 °C min<sup>-1</sup> for (H); 110°C to 190°C at 30 °C min<sup>-1</sup> for (I). Flow rate: 1.0 mL min<sup>-1</sup> for (A, D, G); 1.5 mL min<sup>-1</sup> for (B, H); 2.0 mL min<sup>-1</sup> for (C, F, I); 0.5 mL min<sup>-1</sup> for (E).

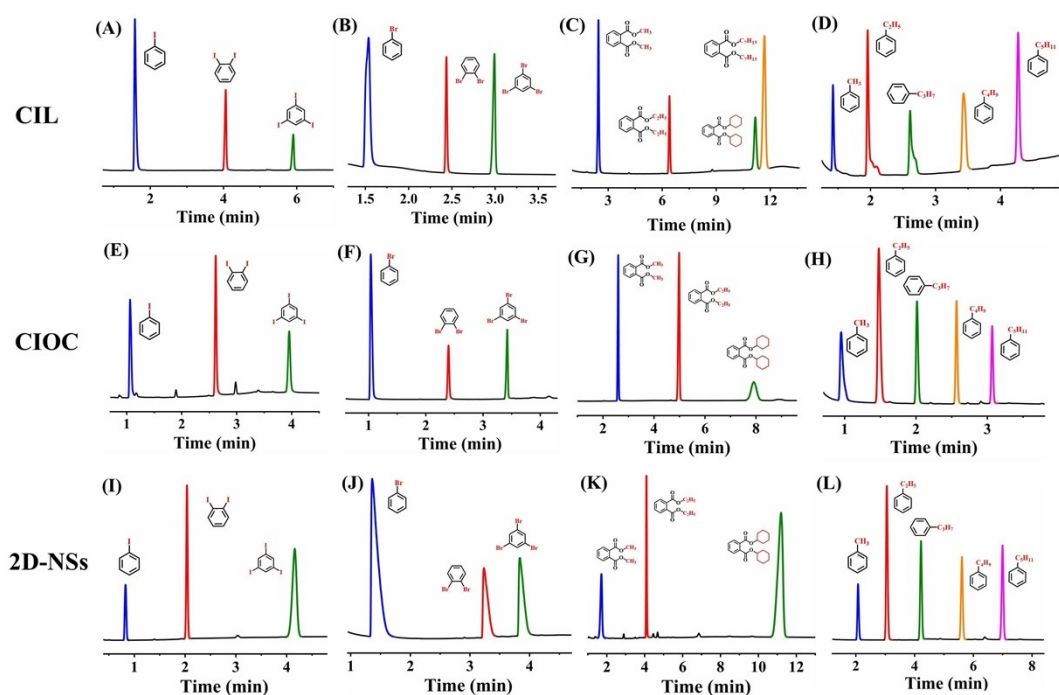

**Fig. S9.** Separation of benzene series on CIL, CIOC and 2D-NSs coated columns. Gas chromatographs of CIL coated columns of polyiodobenzene (A), polybromobenzene (B), PAE (C) and alkylbenzenes (D). Gas chromatographs of CIOC coated column of polyiodobenzene (E), polybromobenzene (F), PAE (G), alkylbenzenes (H). Gas chromatographs of 2D-NSs coated column of polyiodobenzene (I), polybromobenzene (J), PAE (K), alkylbenzenes (L). Oven program: 50°C to 180°C at 20 °C min<sup>-1</sup> for (A); 70°C to 150°C at 30 °C min<sup>-1</sup> for (B); 110°C to 200°C at 10 °C min<sup>-1</sup> for (C); 50°C (for 1 min) to 70°C at 30 °C min<sup>-1</sup>, to 140°C at 15 °C min<sup>-1</sup> for (D); 80°C to 180°C at 30 °C min<sup>-1</sup> for (E); 80°C to 140°C at 20 °C min<sup>-1</sup>, to 180°C at 50 °C min<sup>-1</sup> for (F); 110°C to 190°C at 20 °C min<sup>-1</sup> for (G); 50°C (for 0.8 min) to 120°C at 30 °C min<sup>-1</sup> for (H); 110°C to 180°C at 35 °C min<sup>-1</sup> for (I); 50°C to 160°C at 35 °C min<sup>-1</sup> for (J); 100°C to 180°C at 20 °C min<sup>-1</sup> for (K); 50°C to 120°C at 10 °C min<sup>-1</sup> for (L). Flow rate: 2.0 mL min<sup>-1</sup> for (A, C, F, G, I); 3.0 mL min<sup>-1</sup> for (B, E, H); 1.0 mL min<sup>-1</sup> for (D, K, L); 1.5 mL min<sup>-1</sup> for (J).

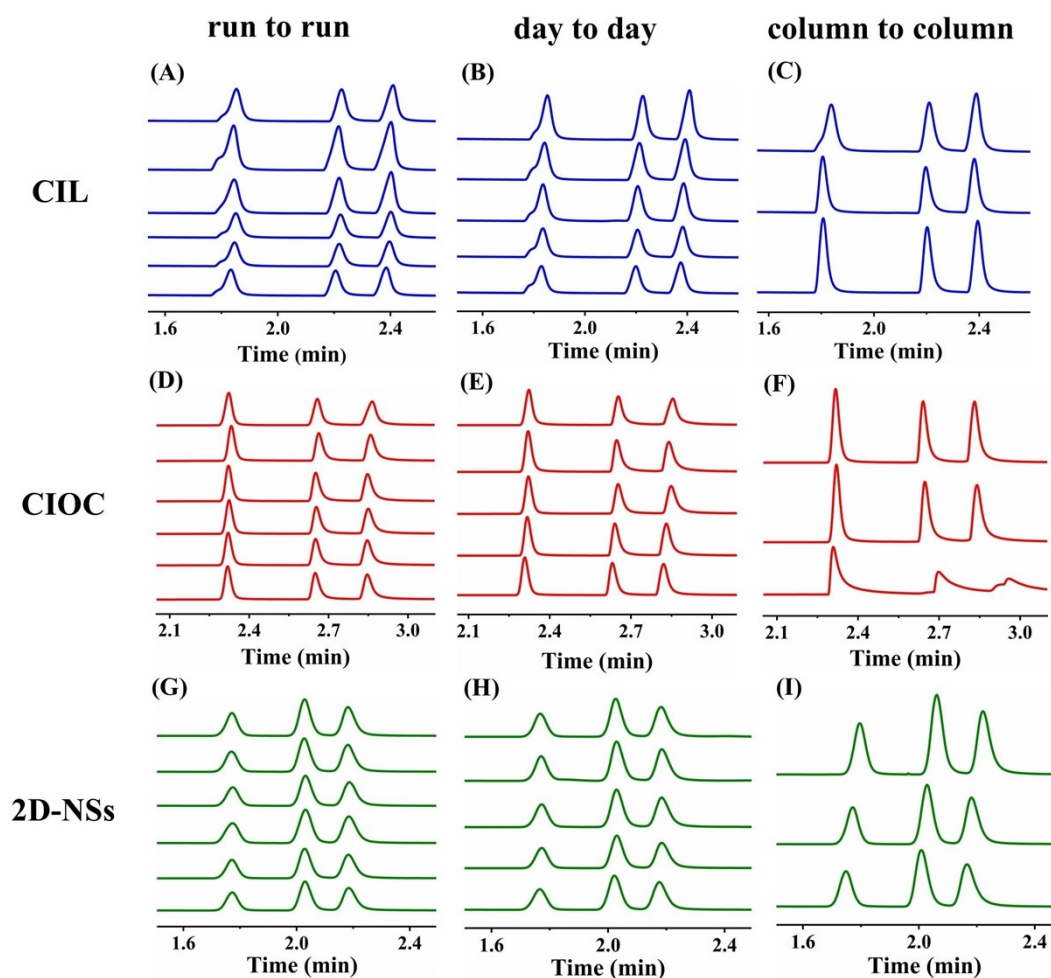

**Fig. S10.** Gas chromatographs of xylenol isomers by six consecutive injects on CIL coated column (A), CIOC coated column (D) and 2D-NSs coated column (G). Gas chromatographs of xylenol isomers by five consecutive days on CIL coated column (B), CIOC coated column (E) and 2D-NSs coated column (H). Gas chromatographs of xylenol isomers by three different columns of CIL (C), CIOC (G) and 2D-NSs (I).

## 5. Table S1 to S10

Table S1. Crystallographic data and parameters for ClOC.

| Name                                      | ClOC                                                                          |
|-------------------------------------------|-------------------------------------------------------------------------------|
| Empirical formula                         | C <sub>46</sub> H <sub>58</sub> N <sub>2</sub> O <sub>10</sub> S <sub>2</sub> |
| Formula weight                            | 863.06                                                                        |
| Temperature/K                             | 296.15                                                                        |
| Crystal system                            | Orthorhombic                                                                  |
| Space group                               | C222 <sub>1</sub>                                                             |
| a/Å                                       | 9.0954(14)                                                                    |
| b/Å                                       | 28.981(4)                                                                     |
| c/Å                                       | 20.898(3)                                                                     |
| α/°                                       | 90                                                                            |
| β/°                                       | 90                                                                            |
| γ/°                                       | 90                                                                            |
| Volume/Å <sup>3</sup>                     | 5508.5(14)                                                                    |
| Z                                         | 4                                                                             |
| ρ <sub>calc</sub> (g/cm <sup>3</sup> )    | 1.041                                                                         |
| μ/mm <sup>-1</sup>                        | 0.145                                                                         |
| F (000)                                   | 1840.0                                                                        |
| Crystal size/mm <sup>3</sup>              | 0.3 × 0.2 × 0.2                                                               |
| Radiation                                 | MoKα (λ = 0.71073)                                                            |
| 2θ range for data collection/°            | 2.81 to 62.672                                                                |
| Index ranges                              | -11 ≤ h ≤ 13, -29 ≤ k ≤ 42, -30 ≤ l ≤ 28                                      |
| Reflections collected                     | 19100                                                                         |
| Independent reflections                   | 8118 [Rint = 0.0297, Rsigma = 0.0447]                                         |
| Data/restraints/parameters                | 8118/0/274                                                                    |
| Goodness-of-fit on F <sup>2</sup>         | 0.999                                                                         |
| Final R indexes (I >= 2σ (I))             | R1 = 0.0517, wR2 = 0.1295                                                     |
| Final R indexes [all data]                | R1 = 0.0929, wR2 = 0.1414                                                     |
| Largest diff. peak/hole/e Å <sup>-3</sup> | 0.20/-0.17                                                                    |
| CCDC number                               | 2361107                                                                       |

**Table S2.** Anisotropic Displacement Parameters ( $\text{\AA}^2 \times 10^3$ ) for ClOC.

| <b>Atom</b> | <b>x</b> | <b>y</b> | <b>z</b> | <b>U (eq)</b> |
|-------------|----------|----------|----------|---------------|
| <b>C1</b>   | 52.2(16) | 60.8(14) | 57.4(13) | -3.0(11)      |
| <b>C2</b>   | 41.0(14) | 66.2(16) | 68.2(16) | 1.9(12)       |
| <b>C3</b>   | 39.4(13) | 63.2(16) | 67.9(16) | 7.2(12)       |
| <b>C4</b>   | 41.5(16) | 55.0(14) | 62.4(14) | 0.5(11)       |
| <b>C5</b>   | 49.7(16) | 72.4(17) | 61.6(16) | -4.2(12)      |
| <b>C6</b>   | 55.8(17) | 75.0(18) | 58.6(15) | -6.6(12)      |
| <b>C7</b>   | 50.0(16) | 73.2(18) | 54.2(14) | -0.2(12)      |
| <b>C8</b>   | 43.9(14) | 78.9(18) | 49.5(13) | 5.3(12)       |
| <b>C9</b>   | 38.0(14) | 51.8(13) | 47.2(11) | -0.2(9)       |
| <b>C10</b>  | 39.0(13) | 69.2(16) | 50.3(13) | 0.4(11)       |
| <b>C11</b>  | 50.8(15) | 64.6(16) | 49.7(13) | 4.0(11)       |
| <b>C12</b>  | 73.7(17) | 57.6(14) | 40.2(11) | 2.7(10)       |
| <b>C13</b>  | 74.8(18) | 56.2(14) | 50.0(13) | 1.3(11)       |
| <b>C14</b>  | 81(2)    | 47.4(14) | 62.1(15) | 0.0(11)       |
| <b>C15</b>  | 86(3)    | 70(2)    | 95(2)    | -8.1(17)      |
| <b>C16</b>  | 82(2)    | 67.9(19) | 120(3)   | 0.1(19)       |
| <b>C17</b>  | 136(4)   | 72(2)    | 98(3)    | -15.4(18)     |
| <b>C18</b>  | 123(3)   | 64.1(18) | 77.4(18) | -15.5(16)     |
| <b>C19</b>  | 112(3)   | 56.6(16) | 65.8(17) | -5.7(13)      |
| <b>C20</b>  | 112(4)   | 57(2)    | 147(4)   | -21(2)        |
| <b>C21</b>  | 175(5)   | 97(3)    | 228(6)   | 4(3)          |
| <b>C22</b>  | 100(4)   | 117(4)   | 312(9)   | -36(4)        |
| <b>C23</b>  | 85(3)    | 144(4)   | 169(5)   | -35(4)        |
| <b>N1</b>   | 55.1(12) | 59.1(11) | 39.4(9)  | 0.7(8)        |
| <b>O1</b>   | 132(2)   | 78.6(14) | 69.7(13) | -8.7(10)      |
| <b>O2</b>   | 121(2)   | 80.2(15) | 73.1(13) | 12.4(10)      |
| <b>O3</b>   | 67.1(16) | 328(5)   | 70.5(15) | 11(2)         |
| <b>O4</b>   | 170(3)   | 58.8(11) | 53.4(10) | 10.0(9)       |
| <b>O5</b>   | 91.5(14) | 52.0(9)  | 48.4(9)  | -4.1(7)       |
| <b>S1</b>   | 63.4(4)  | 87.9(5)  | 56.6(4)  | 1.8(4)        |



**Table S3.** McReynolds constants of CIL, CIOC and 2D-NSs columns.

| <b>Stationary phases</b> | <b>X'</b> | <b>Y'</b> | <b>Z'</b> | <b>U'</b> | <b>S'</b> | <b>average polarity</b> |
|--------------------------|-----------|-----------|-----------|-----------|-----------|-------------------------|
| <b>CIL</b>               | 1078      | 670       | 738       | 819       | 810       | 179                     |
| <b>CIOC</b>              | 602       | 725       | 721       | 808       | 880       | 103                     |
| <b>2D-NSs</b>            | 105       | 206       | 168       | 175       | 164       | 164                     |

Temperature, 120°C; flow rate: 1.0 mL/min.

**Table S4.** Chromatographic conditions,  $R_s$  and  $\alpha$  of racemates on CIL coated column.

| <b>enantiomers</b>          | <b>Temperature (°C)</b> | <b>v (mL min<sup>-1</sup>)</b> | <b><math>R_s</math></b> | <b><math>\alpha</math></b> |
|-----------------------------|-------------------------|--------------------------------|-------------------------|----------------------------|
| <b>trans-stilbene oxide</b> | 180                     | 1.0                            | 3.71                    | 1.06                       |
| <b>decahydronaphthalene</b> | 85                      | 2.0                            | 2.64                    | 1.19                       |
| <b>mandelonitrile</b>       | 80                      | 2.0                            | 6.85                    | 1.55                       |
| <b>pyroglutamic acid*</b>   | 180                     | 1.0                            | 4.89                    | 1.14                       |
| <b>mandelic acid</b>        | 100                     | 2.0                            | 20.21                   | 3.80                       |
| <b>diflubenzuron</b>        | 100                     | 2.0                            | 5.86                    | 1.38                       |
| <b>furoin</b>               | 190                     | 1.0                            | 6.43                    | 1.11                       |
| <b>propiconazole</b>        | 180                     | 1.0                            | 0.98                    | 1.15                       |

\*Trifluoroacetyl butyl ester derivatives.

**Table S5.** Chromatographic conditions,  $R_s$  and  $\alpha$  of racemates on CIOC coated column.

| enantiomers          | Temperature (°C) | v (mL min <sup>-1</sup> ) | $R_s$ | $\alpha$ |
|----------------------|------------------|---------------------------|-------|----------|
| decahydronaphthalene | 105              | 1.0                       | 2.99  | 1.19     |
| mandelonitrile       | 80               | 2.0                       | 11.00 | 1.49     |
| epichlorohydrin      | 110              | 1.0                       | 17.92 | 1.76     |
| pyroglutamic acid*   | 180              | 1.0                       | 9.08  | 1.38     |
| trans-stilbene oxide | 180              | 1.0                       | 2.09  | 1.09     |
| diflubenzuron        | 140              | 2.                        | 13.48 | 2.18     |
| triflumuron          | 100              | 2.0                       | 1.92  | 1.28     |
| hexaflumuron         | 150              | 2.0                       | 6.28  | 1.14     |
| benzoin ethyl ether  | 170              | 1.0                       | 7.28  | 1.47     |
| 2-phenyloxolane      | 150              | 1.0                       | 1.04  | 1.05     |

\*Trifluoroacetyl butyl ester derivatives.

**Table S6.** Chromatographic conditions,  $R_s$  and  $\alpha$  of isomers on 2D-NSs coated column.

| enantiomers          | Temperature (°C) | $v$ (mL min <sup>-1</sup> ) | $R_s$ | $\alpha$ |
|----------------------|------------------|-----------------------------|-------|----------|
| decahydronaphthalene | 45               | 1.5                         | 4.68  | 1.27     |
| mandelonitrile       | 150              | 1.0                         | 14.85 | 11.33    |
| epichlorohydrin      | 70               | 1.0                         | 13.29 | 1.92     |
| benzoin              | 150              | 1.0                         | 5.26  | 1.31     |
| pyroglutamic acid*   | 180              | 1.0                         | 2.81  | 1.14     |
| trans-stilbene oxide | 150              | 1.5                         | 17.97 | 1.57     |
| diflubenzuron        | 140              | 2.0                         | 15.99 | 2.11     |
| triflumuron          | 115              | 1.0                         | 2.80  | 1.23     |
| hexaflumuron         | 140              | 1.0                         | 4.09  | 1.48     |
| epibromohydrin       | 50               | 2.                          | 3.62  | 1.29     |
| ibuprofen            | 150              | 1.5                         | 5.26  | 1.31     |
| benzoin methyl ether | 60               | 1.3                         | 10.91 | 1.77     |
| furoin               | 180              | 1.0                         | 5.35  | 1.30     |

\*Trifluoroacetyl butyl ester derivatives.

**Table S7.** Comparison of enantioseparation performance of enantiomers by 2D-NSs coated GC columns and  $\beta$ -DEX 120 commercial columns.

| enantiomers          | 2D-NSs |                              |       |          | $\beta$ -DEX 120 |                              |       |          |
|----------------------|--------|------------------------------|-------|----------|------------------|------------------------------|-------|----------|
|                      | T (°C) | v<br>(mL min <sup>-1</sup> ) | Rs    | $\alpha$ | T (°C)           | v<br>(mL min <sup>-1</sup> ) | Rs    | $\alpha$ |
| decahydronaphthalene | 45     | 1.5                          | 4.68  | 1.27     | 150              | 1.0                          | 7.42  | 1.18     |
| mandelonitrile       | 150    | 1.0                          | 14.85 | 11.33    | 150              | 1.0                          | -     | 1.00     |
| epichlorohydrin      | 70     | 1.0                          | 13.29 | 1.92     | 100              | 1.0                          | -     | 1.00     |
| benzoin              | 150    | 1.0                          | 5.26  | 1.31     | 220              | 1.0                          | 6.74  | 1.14     |
| pyroglutamic acid*   | 180    | 1.0                          | 2.81  | 1.14     | 140              | 2.0                          | 3.40  | 1.52     |
| trans-stilbene oxide | 150    | 1.5                          | 17.97 | 1.57     | 210              | 1.0                          | -     | 1.00     |
| diflubenzuron        | 140    | 2.0                          | 15.99 | 2.11     | 200              | 2.0                          | 10.77 | 1.48     |
| triflumuron          | 115    | 1.0                          | 2.80  | 1.23     | 200              | 1.0                          | 4.00  | 1.13     |
| hexaflumuron         | 140    | 1.0                          | 4.09  | 1.48     | 220              | 10                           | 2.13  | 1.06     |
| epibromohydrin       | 50     | 2.0                          | 3.62  | 1.29     | 130              | 1.0                          | -     | 1.00     |
| ibuprofen            | 150    | 1.5                          | 5.26  | 1.31     | 210              | 1.0                          | 1.04  | 1.02`    |
| benzoin methyl ether | 60     | 1.3                          | 10.91 | 1.77     | 180              | 1.0                          | 1.13  | 1.01     |
| furoin               | 100    | 1.0                          | 5.35  | 1.30     | 180              | 1.0                          | 1.25  | 1.03     |

\*Trifluoroacetyl butyl ester derivatives.

**Table S8.** The thermodynamic parameters of (+/–)-decahydronaphthalene on CIL, CIOC and 2D-NSs coated columns.

| Columns | Analytes                 | $\Delta H$              | $\Delta S$                             | $\Delta G$              | $R^2$  |
|---------|--------------------------|-------------------------|----------------------------------------|-------------------------|--------|
|         |                          | (kJ mol <sup>-1</sup> ) | (J mol <sup>-1</sup> k <sup>-1</sup> ) | (kJ mol <sup>-1</sup> ) |        |
| CIL     | (+)-decahydronaphthalene | -44.56                  | -148.01                                | -8.13±0.26              | 0.9990 |
|         | (–)-decahydronaphthalene | -43.14                  | -146.37                                | -7.30±0.25              | 0.9994 |
| CIOC    | (+)-decahydronaphthalene | -44.83                  | -144.21                                | -7.51±0.25              | 0.9997 |
|         | (–)-decahydronaphthalene | -44.38                  | -145.20                                | -6.69±0.25              | 0.9998 |
| 2D-NSs  | (+)-decahydronaphthalene | -48.28                  | -147.54                                | -15.25±0.23             | 0.9995 |
|         | (–)-decahydronaphthalene | -48.68                  | -151.12                                | -14.35±0.23             | 0.9998 |

**Table S9.** Rs and  $\alpha$  of positional isomers on CIL, CIOC, 2D-NSs and AB-5MS columns.

| Analytes                    | CIL  |          | CIOC |          | 2D-NSs |          | AB-5MS |          |
|-----------------------------|------|----------|------|----------|--------|----------|--------|----------|
|                             | Rs   | $\alpha$ | Rs   | $\alpha$ | Rs     | $\alpha$ | Rs     | $\alpha$ |
| <i>o-/m</i> -nitroaniline   | 4.46 | 1.20     | 3.98 | 1.19     | 3.61   | 1.36     | 1.11   | 1.17     |
| <i>m-/p</i> -nitroaniline   | 8.26 | 1.26     | 3.22 | 1.31     | 3.59   | 1.46     | 14.49  | 1.31     |
| <i>o-/m</i> -nitrotoluene   | 2.71 | 1.08     | 3.92 | 1.08     | 2.06   | 1.17     | 6.33   | 1.06     |
| <i>m-/p</i> -nitrotoluene   | 1.63 | 1.04     | 2.25 | 1.04     | 1.90   | 1.16     | 2.97   | 1.03     |
| <i>o-/m</i> -dimethylphenol | 5.58 | 1.20     | 6.42 | 1.14     | 3.37   | 1.14     | 4.60   | 1.07     |
| <i>m-/p</i> -dimethylphenol | 2.75 | 1.08     | 3.41 | 1.08     | 1.93   | 1.08     | 6.54   | 1.04     |

**Table S10.** Rs and  $\alpha$  of benzene series on CIL, CIOC and 2D-NSs coated columns.

| Analytes                                 | CIL   |          | CIOC  |          | 2D-NSs |          |
|------------------------------------------|-------|----------|-------|----------|--------|----------|
|                                          | Rs    | $\alpha$ | Rs    | $\alpha$ | Rs     | $\alpha$ |
| iodobenzene/1,2-diiodobenzene            | 30.12 | 2.57     | 27.84 | 2.47     | 22.31  | 2.46     |
| 1,2-diiodobenzene/1,3,5-triiodobenzene   | 20.87 | 1.45     | 21.49 | 1.51     | 20.08  | 2.04     |
| bromobenzene/1,2-dibromobenzene          | 13.29 | 1.59     | 23.79 | 2.31     | 10.59  | 2.38     |
| 1,2-dibromobenzene/1,3,5-tribromobenzene | 13.31 | 1.23     | 20.75 | 1.43     | 3.85   | 1.18     |
| dimethyl-/diethyl-phthalate              | 5.74  | 2.60     | 28.35 | 1.92     | 24.82  | 2.92     |
| diethyl-/dicyclohexyl-phthalate          | 25.72 | 1.74     | 11.46 | 1.59     | 20.30  | 2.38     |
| dicyclohexyl-/diheptyl-phthalate         | 1.95  | 1.05     | -     | -        | -      | -        |
| toluene/ethylbenzene                     | 11.89 | 1.38     | 7.30  | 1.56     | 10.12  | 1.42     |
| ethylbenzene/propylbenzene               | 11.51 | 1.33     | 8.66  | 1.36     | 10.92  | 1.38     |
| propylbenzene/butylbenzene               | 9.51  | 1.32     | 11.04 | 1.28     | 12.43  | 1.33     |
| butylbenzene/phenylbenzene               | 9.42  | 1.24     | 10.73 | 1.19     | 12.12  | 1.25     |



**Table S11.** Repeatability and reproducibility for the retention time of xylenol isomers on CIL, CIOC and 2D-NSs coated columns.

| Column |                              |                      | 2,6-<br>dimethyl<br>phenol | 2,5-<br>dimethylp<br>henol | 3,5-<br>dimethyl<br>phenol |
|--------|------------------------------|----------------------|----------------------------|----------------------------|----------------------------|
| CIL    | run to run<br>(n=6)          | t <sub>R</sub> (min) | 1.846                      | 2.218                      | 2.340                      |
|        |                              | RSD (%)              | 0.393                      | 0.335                      | 0.336                      |
|        | day to day<br>(n=5)          | t <sub>R</sub> (min) | 1.839                      | 2.210                      | 2.389                      |
|        |                              | RSD (%)              | 0.473                      | 0.476                      | 0.531                      |
|        | column to<br>column<br>(n=3) | t <sub>R</sub> (min) | 1.819                      | 2.186                      | 2.373                      |
|        |                              | RSD (%)              | 1.222                      | 1.998                      | 1.843                      |
| CIOC   | run to run<br>(n=6)          | t <sub>R</sub> (min) | 2.322                      | 2.652                      | 2.848                      |
|        |                              | RSD (%)              | 0.099                      | 0.060                      | 0.064                      |
|        | day to day<br>(n=5)          | t <sub>R</sub> (min) | 2.320                      | 2.645                      | 2.839                      |
|        |                              | RSD (%)              | 0.103                      | 0.336                      | 0.476                      |
|        | column to<br>column<br>(n=3) | t <sub>R</sub> (min) | 2.310                      | 2.662                      | 2.877                      |
|        |                              | RSD (%)              | 0.523                      | 1.168                      | 2.452                      |
| 2D-NSs | run to run<br>(n=6)          | t <sub>R</sub> (min) | 1.772                      | 2.029                      | 2.184                      |
|        |                              | RSD (%)              | 0.077                      | 0.097                      | 0.089                      |
|        | day to day<br>(n=5)          | t <sub>R</sub> (min) | 1.770                      | 2.028                      | 2.182                      |
|        |                              | RSD (%)              | 0.185                      | 0.161                      | 0.139                      |
|        | column to<br>column<br>(n=3) | t <sub>R</sub> (min) | 1.772                      | 2.033                      | 2.190                      |
|        |                              | RSD (%)              | 1.354                      | 1.343                      | 1.311                      |

## References

- [1] D. A. Klumpp, R. M. Sobel, S. G. Kokkinidou, B. Osei-Badu, Z. Liveris, R. A. Klumpp, M. R. Stentzel, *ACS Omega* **2020**, *5*, 4043-4049.
- [2] Q. Zong, M. Chen, L. Su, C. Cai, L. Ding, C. Miao, J. Wu, *Chem. Ind. Times* **2010**, *24*, 21-24.
- [3] B. Huang, K. Li, Q. Ma, T. Xiang, R. Liang, Y. Gong, B. Wang, J. Zhang, S. Xie, L. Yuan, *Anal. Chem.* **2023**, *95*, 13289-13296.
- [4] Chetan Shende, Abuzar Kabir, Eric Townsend, A. Malik, *Anal. Chem.* **2003**, *75*, 3518-3530.
- [5] X. Wang, M. Qi, R. Fu, *J. Chromatogr. A* **2014**, *1371*, 237-243.
- [6] M. N. Corella-Ochoa, J. B. Tapia, H. N. Rubin, V. Lillo, J. González-Cobos, J. L. Núñez-Rico, S. R. G. Balestra, N. Almora-Barrios, M. Lledós, A. Güell-Bara, J. Cabezas-Giménez, E. C. Escudero-Adán, A. Vidal-Ferran, S. Calero, M. Reynolds, C. Martí-Gastaldo, J. R. Galán-Mascarós, *J. Am. Chem. Soc.* **2019**, *141*, 14306-14316.
- [7] W. Kou, C. Yang, X. Yan, *J. Mater. Chem. A* **2018**, *6*, 17861-17866.
